# Supplementary material for: Immune cells during compensatory renal hypertrophy after unilateral nephrectomy
Source: Research Square preprint supplement (doi:10.21203/rs.3.rs-9568023/v1), 2026-05-15
Supplement: Supplementary file 1 [file 73f8b4952fa713b312f9dcaf.pdf]

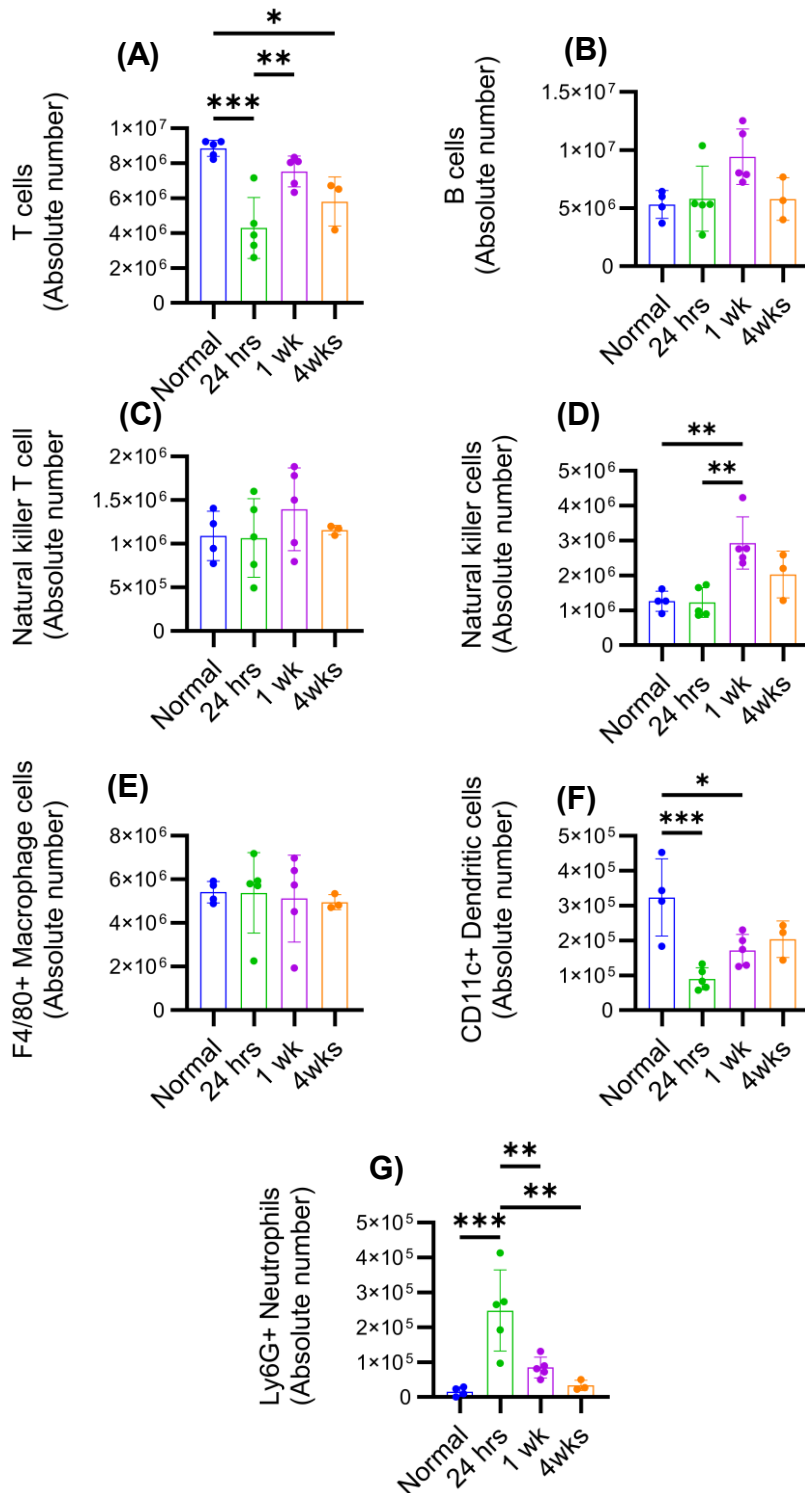

**Suppl. Fig. S1**

**Suppl. Fig. S1. Uninephrectomy changes absolute numbers of immune cells in the remnant kidney.** (A) TCRβ<sup>+</sup> T cells, (B) B cells, (C) NK cells, (D) NKT cells, (E) Macrophages, (F) Dendritic cells, and (G) Neutrophils, change as a percentage of CD45<sup>+</sup> immune cells after UNx. Data are presented as mean ± SEM. N=5-6 per group (except 4 weeks group n=3), with each dot representing an individual mouse. Statistical comparisons were performed using one-way ANOVA with Tukey's post hoc analysis. UNx, unilateral nephrectomy.

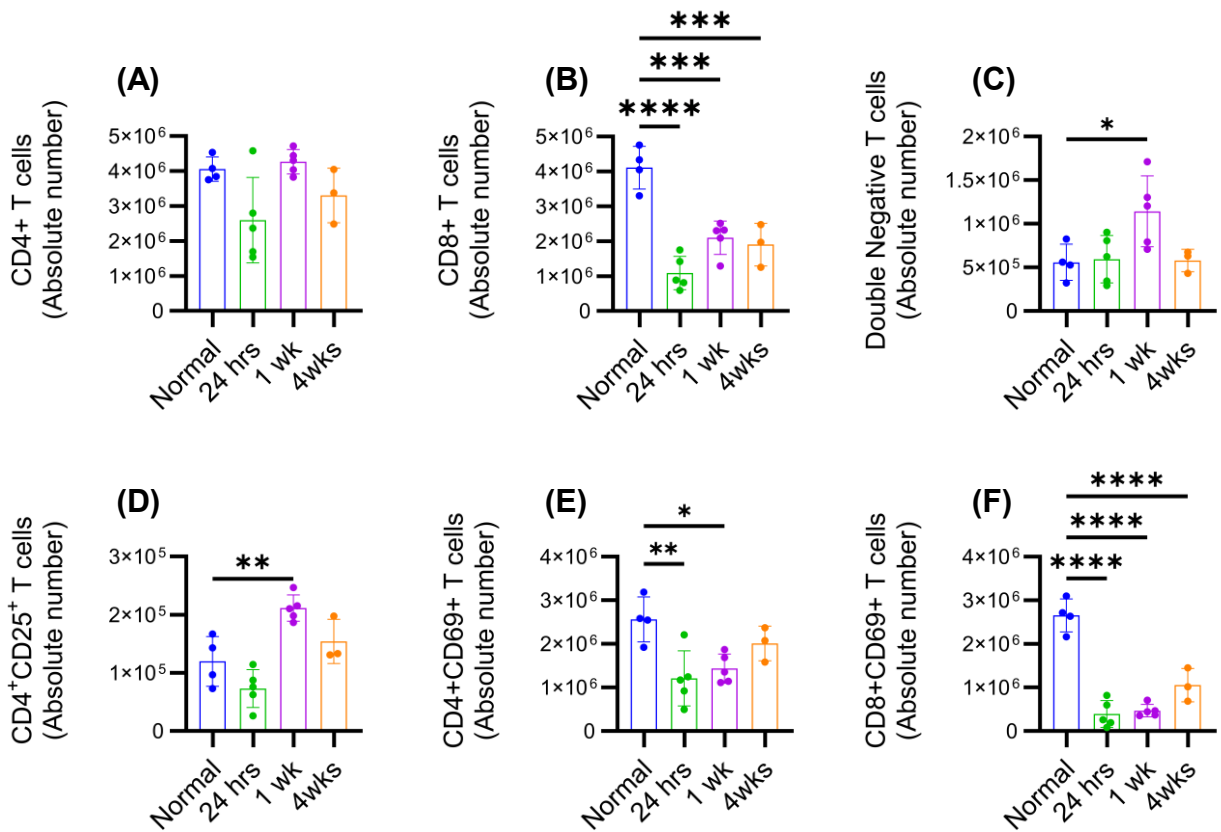

**Suppl. Fig. S2**

**Suppl. Fig. S2. Uninephrectomy increases the absolute numbers of Tregs at one week and Double Negative T cells over time.** (A) CD4<sup>+</sup> cells, (B) CD8<sup>+</sup> cells, and (C) DN (TCRβ<sup>+</sup>CD4<sup>-</sup>CD8<sup>-</sup>) cells. T cell activation Markers (D) CD25<sup>+</sup>CD4<sup>+</sup>, (E) CD69<sup>+</sup>CD4<sup>+</sup>, (F) CD69<sup>+</sup>CD8<sup>+</sup>, and Data are presented as mean ± SEM. N=5-6 per group (except 4 weeks group n=3), with each dot representing an individual mouse. Statistical comparisons were conducted using one-way ANOVA with Tukey's post hoc analysis.

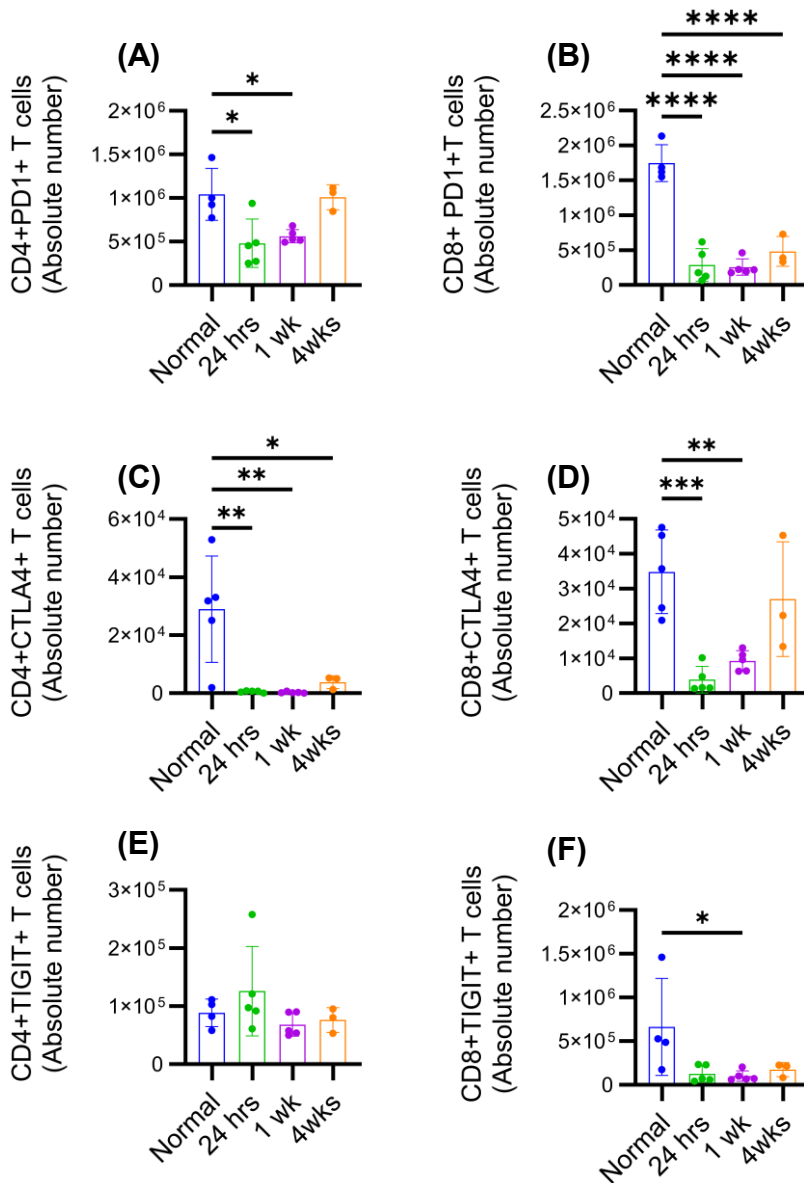

**Suppl. Fig. S3**

**Suppl. Fig. S3. Uninephrectomy decreased absolute numbers of immune checkpoint inhibitor PD1, CTLA4, and TIGIT expressing CD4<sup>+</sup> and CD8<sup>+</sup> T cells. (A) PD-1 CD4<sup>+</sup> cells; (B) PD-1 CD8<sup>+</sup> (C) CD4 CTLA4 (D) CTLA4 CD8, (E) CD4 (F) TIGIT+ CD8. Data are presented as mean ± SEM. N=5-6 per group (except 4-week group n=3), with each dot representing an individual mouse. Statistical comparisons were conducted using one-way ANOVA with Tukey's post hoc analysis.**
